# Supplementary material for: Dissolved inorganic nutrients in the western Mediterranean Sea (2004–2017)
Source: Copernicus journal article supplement (doi:10.5194/essd-12-1985-2020), 2020-09-04
Supplement: Supplementary file 1 [file essd-12-1985-2020-supplement.pdf]

Supplement of Earth Syst. Sci. Data, 12, 1985–2011, 2020  
<https://doi.org/10.5194/essd-12-1985-2020-supplement>  
© Author(s) 2020. This work is distributed under  
the Creative Commons Attribution 4.0 License.

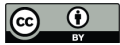

Open Access Earth System  
Science  
Data

*Supplement of*

## **Dissolved inorganic nutrients in the western Mediterranean Sea (2004–2017)**

**Malek Belgacem et al.**

*Correspondence to:* Jacopo Chiggiato ([jacopo.chiggiato@ismar.cnr.it](mailto:jacopo.chiggiato@ismar.cnr.it))

The copyright of individual parts of the supplement might differ from the CC BY 4.0 License.

1 **Supplementary material – Part 1**

2 **Figure S1.** Overview of vertical inorganic nutrient profiles and spatial coverage of reference cruises.

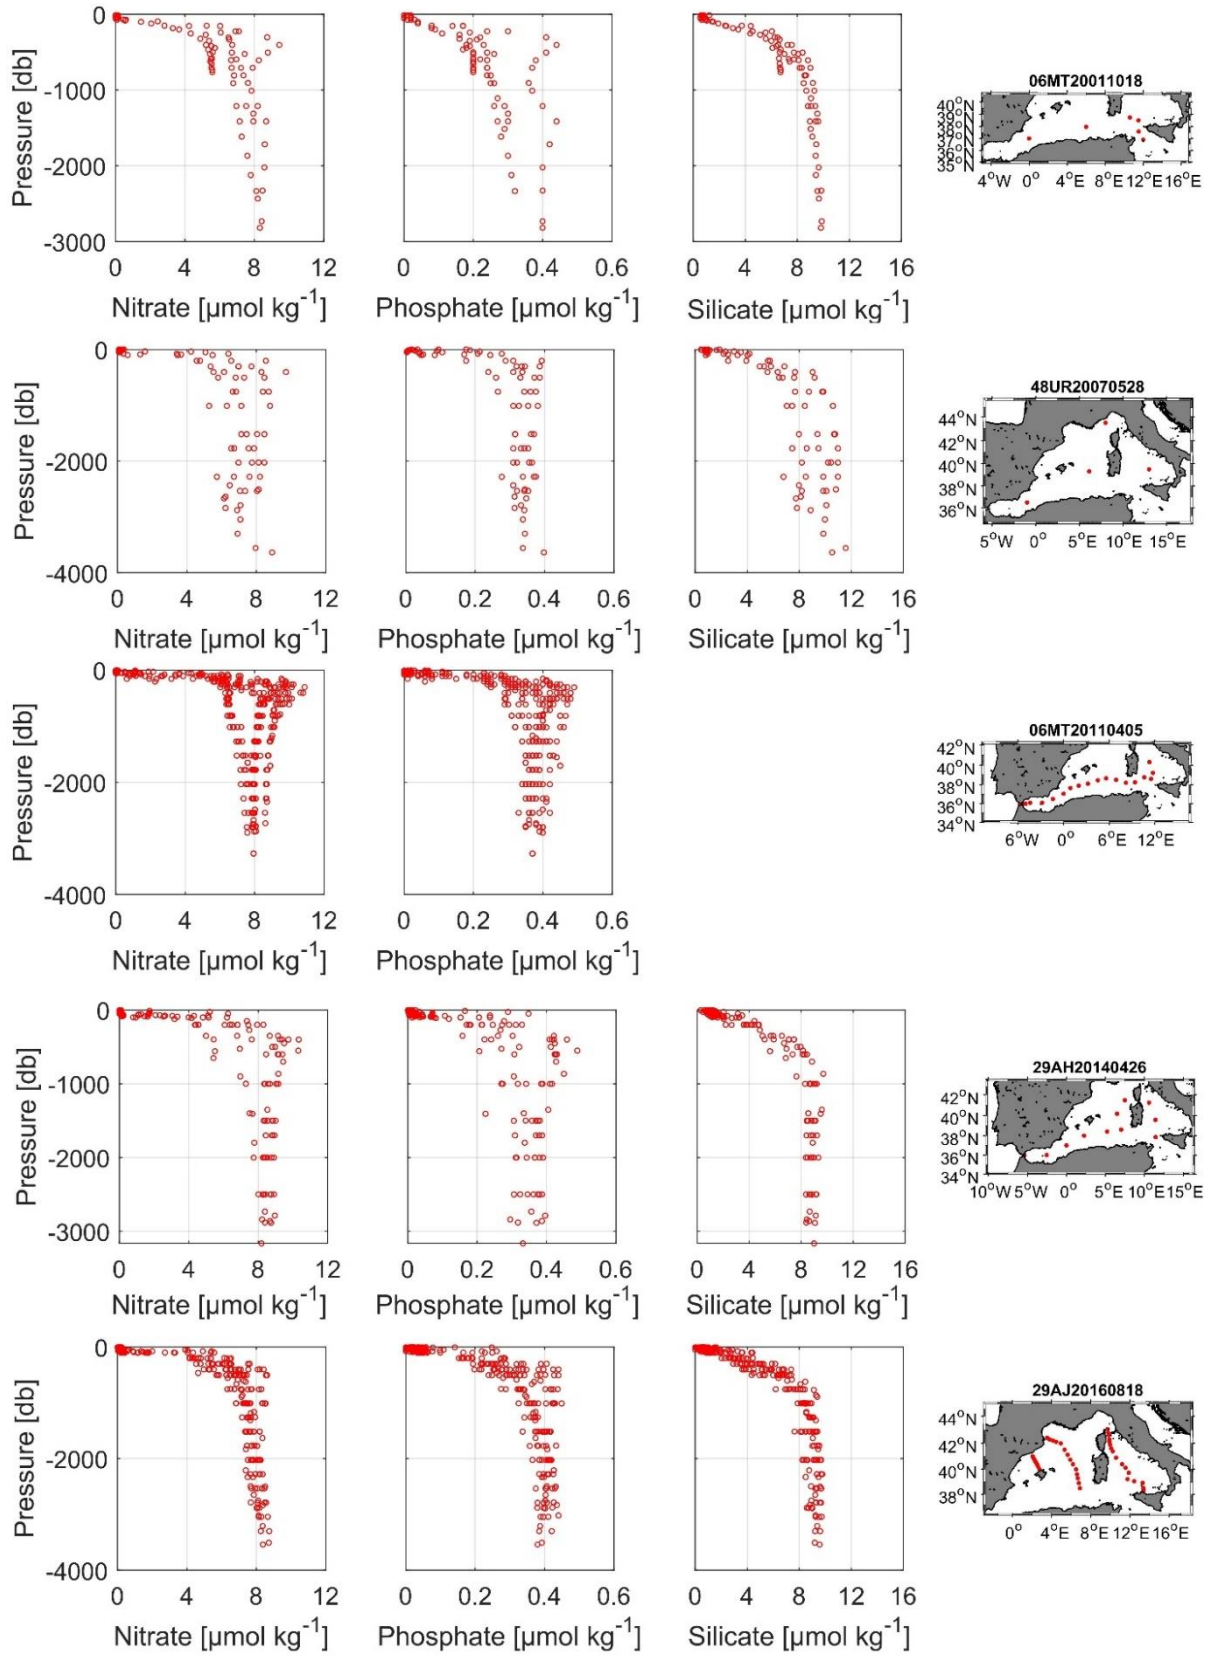

3  
4

5 **Figure S2.** Map of the WMED showing the geographical limits of the MEDAR/Medatlas sub-regions  
 6 defined in Table S2. according to Manca et al. (2004).

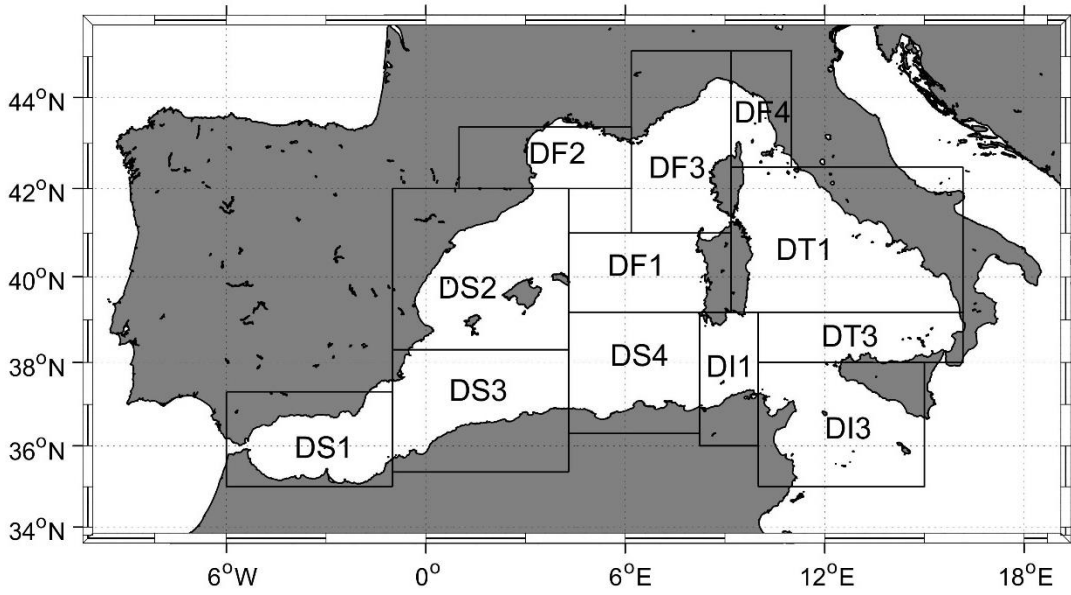

7  
 8  
 9 **Figure S3.** Weighted mean offset for nitrate, before (grey) and after adjustment (blue). Error bars indicate  
 10 the standard deviation of the absolute weighted offset. The dashed lines indicate the accuracy limit 2% for  
 11 an adjustment to be recommended

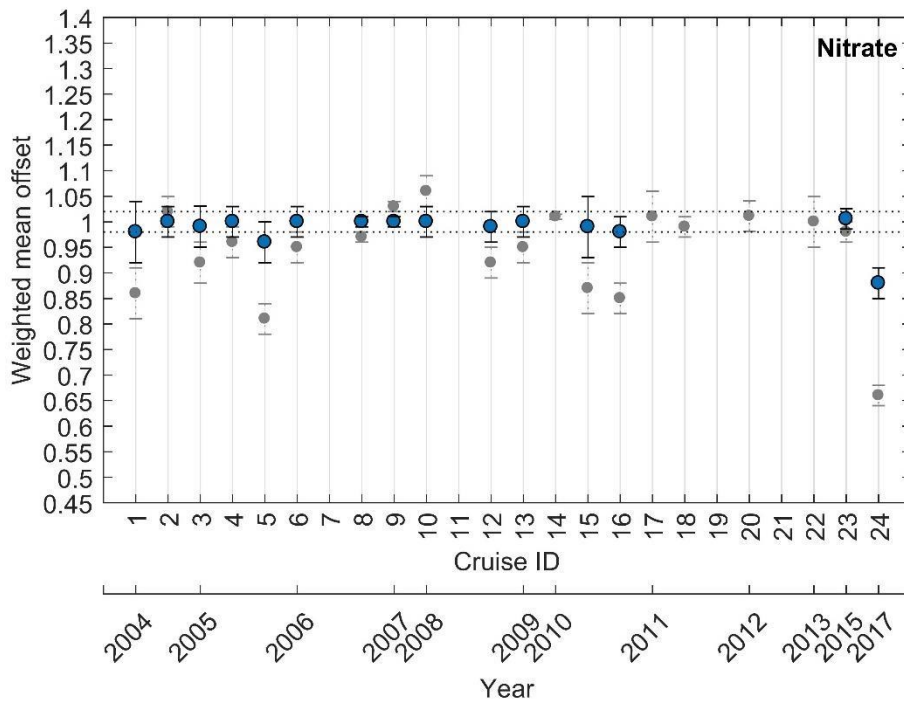

12

13 **Figure S4.** Same as Fig. S2 but for phosphate

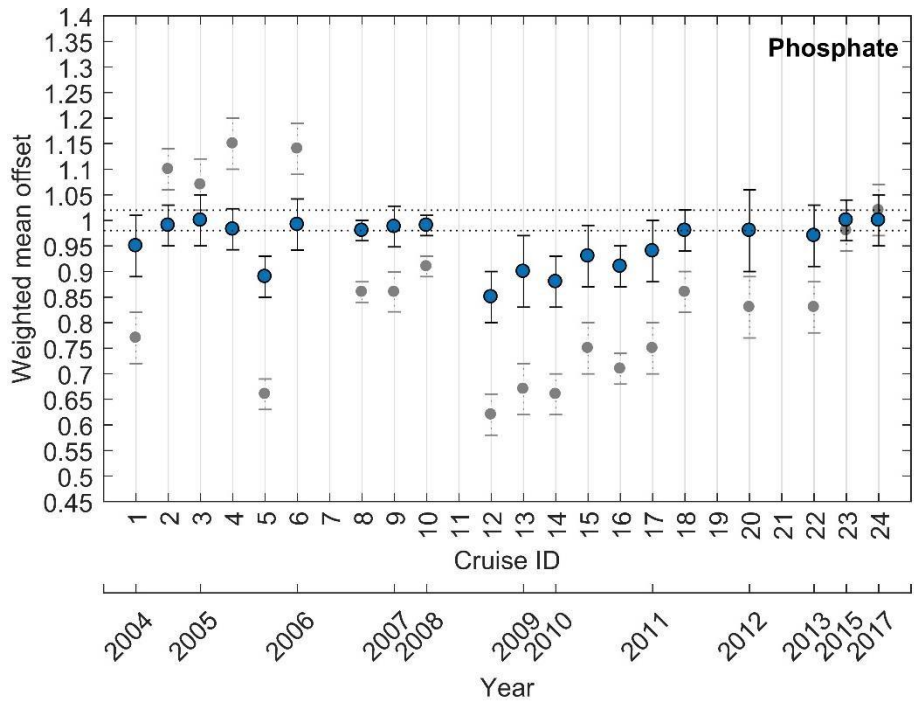

14

15 **Figure S5.** Same as Fig. S2 but for silicate.

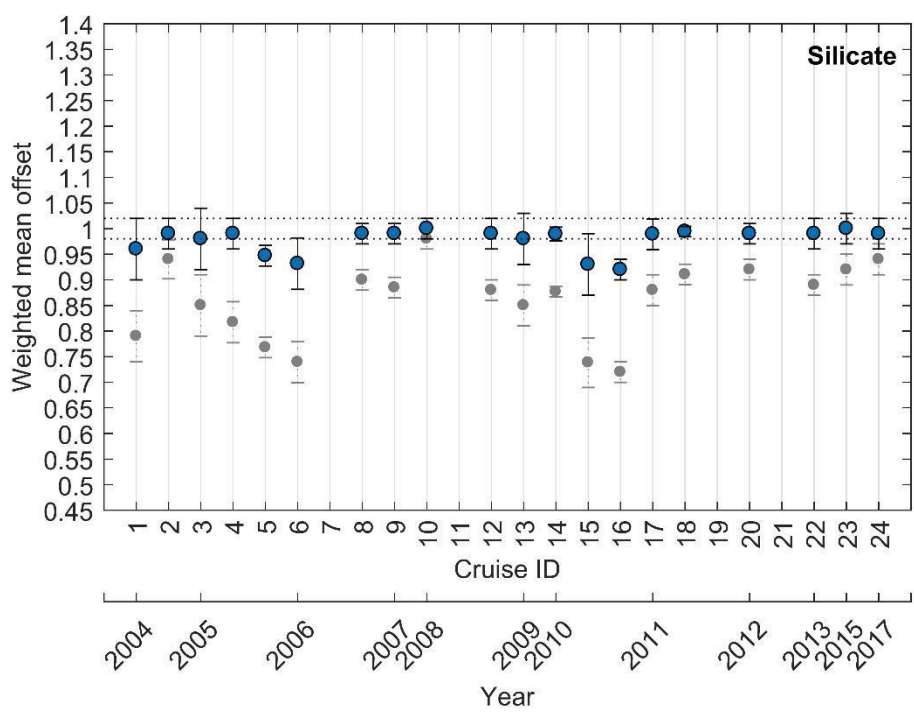

16

**Table S1.** Summary table of laboratories and instruments used for nutrient analysis.

| Laboratory        | Autoanalyzer                                                                   | Detection limit                                                                             |
|-------------------|--------------------------------------------------------------------------------|---------------------------------------------------------------------------------------------|
| ENEA              | continuous-flow system multichannel (Auto Analyzer Bran+Luebbe III Generation) | limit of 0.01 $\mu$ M for nitrate+nitrite, 0.01 $\mu$ M for phosphate and 0.05 for silicate |
| CNR-ISMAR Trieste | OI-Analytical (Flow Solution III) flow-segmented                               | limit of 0.01 $\mu$ M for nitrate+nitrite, 0.01 $\mu$ M for phosphate and 0.05 for silicate |
| CNR-ISMAR Venezia | Systea discrete analyzer EasyChem Plus                                         | limit of 0.1 $\mu$ M for nitrate, 0.01 $\mu$ M for phosphate and 0.02 $\mu$ M for silicate  |

**Table S2.** Geographical limits of subregion referring to Manca et al. (2004).

| Code | Region           | Lat °N (min) | Lat °N(max) | Lon °E (min) | Lon °E (max) | Maximum pressure(db) |
|------|------------------|--------------|-------------|--------------|--------------|----------------------|
| DF2  | Gulf of Lions    | 42           | 43.36       | 1            | 6.18         | 2517                 |
| DF3  | Liguro-Provençal | 41           | 45          | 6.18         | 9.18         | 2728                 |
| DF4  | Ligurian East    | 42.48        | 45          | 9.18         | 11           | 1299                 |
| DS2  | Balearic Sea     | 38.30        | 42          | -1           | 4.3          | 2741                 |
| DF1  | Algero-Provençal | 39.18        | 41          | 4.3          | 9.18         | 2891                 |
| DS1  | Alboran Sea      | 35.0         | 37.3        | -6           | -1           | 2683                 |
| DS3  | Algerian West    | 35.36        | 38.3        | -1           | 4.3          | 2837                 |
| DS4  | Algerian East    | 36.30        | 39.18       | 4.3          | 8.24         | 2890                 |
| DT1  | Tyrrhenian North | 39.18        | 42.48       | 9.18         | 16.16        | 3610                 |
| DT3  | Tyrrhenian South | 38           | 39.18       | 10           | 16.16        | 3551                 |
| DI1  | Sardinia Channel | 36.0         | 39.18       | 8.24         | 10           | 2455                 |
| DI3  | Sicily Strait    | 35           | 38          | 10           | 15           | 664                  |

**Table S3.** Reference cruises and coefficient of variation of nitrate, phosphate and silicate below 1000db.

| Reference cruise ID | EXPOCODE     | std Nitrate | std Phosphate | std Silicate | # samples |
|---------------------|--------------|-------------|---------------|--------------|-----------|
| 6                   | 06MT20011018 | 0.064       | 0.179         | 0.035        | 26        |
| 22                  | 48UR20070528 | 0.121       | 0.074         | 0.144        | 34        |
| 27                  | 29AJ20160818 | 0.052       | 0.062         | 0.054        | 116       |
| 64                  | 06MT20110405 | 0.073       | 0.071         | -            | 42        |
| 17                  | 29AH20140426 | 0.045       | 0.112         | 0.036        | 91        |

## **Supplementary material – Part 2**

### **A1. Data product description**

The data product includes 870 stations sampled during 24 cruises between 2004 and 2017 in the Western Mediterranean Sea mainly on board of research vessels owned by the Italian National Research Council. It includes bottle data combined with CTD data.

In all stations, measurements were carried out with a CTD-rosette system consisting of a CTD SBE 911 plus and a General Oceanics rosette with 24 12-l Niskin Bottles at the observed depth of the bottle sample. Temperature measurements were performed with an SBE-3/F thermometer with a resolution of  $10^{-3}$  °C and conductivity measurements were performed with an SBE-4 sensor with a resolution of  $3 \cdot 10^{-4}$  S/m. The probes were calibrated before and after the cruise. Except for salinity, no certified reference material (CRM) was used. CTD salinity was calibrated against measurements made with a salinometer.

Samples of nitrate, phosphate and silicate were frozen to  $-20^{\circ}\text{C}$  and stored before being analysed in laboratories onshore.

Measurements were subjected to a rigorous quality control (primary and secondary quality control) and the dataset presented is the product adjusted after the application of quality control approaches.

### **A2. Data product organization details**

Cruise identification: To guarantee the comparability between measurements, an alphanumeric identification code (ID) together with an expedition code (Expocode) are defined a unique identifier. The list of the parameters included in the data product are detailed in table below:

| #  | Short name in data files | Parameter             | Unit/format             | Method/ description                                                                                                | Comment                | Original Dataset | Adjusted Product |
|----|--------------------------|-----------------------|-------------------------|--------------------------------------------------------------------------------------------------------------------|------------------------|------------------|------------------|
| 1  | EXPOCODE                 | Expedition code       | 24 EXPOCODEs            | 12 digits: <i>Shipcode_yyyy_mm_dd</i><br><i>yyyy_mm_dd: cruise starting day</i>                                    |                        | ✓                | ✓                |
| 2  | CRUISE                   | Cruise ID             | 24 Cruise IDs           |                                                                                                                    |                        | ✓                | ✓                |
| 3  | DATE                     | Event date            | yyyy-mm-dd              |                                                                                                                    |                        | ✓                | ✓                |
| 4  | TIME                     | Event time            | hhmm                    |                                                                                                                    |                        | ✓                | ✓                |
| 5  | DAY                      | Day                   | dd                      |                                                                                                                    |                        | ✓                | ✓                |
| 6  | MONTH                    | Month                 | mm                      |                                                                                                                    |                        | ✓                | ✓                |
| 7  | YEAR                     | Year                  | yyyy                    |                                                                                                                    |                        | ✓                | ✓                |
| 8  | LATITUDE                 | Longitude             |                         |                                                                                                                    |                        | ✓                | ✓                |
| 9  | LONGITUDE                | Latitude              |                         |                                                                                                                    |                        | ✓                | ✓                |
| 10 | STNNBR                   | Station number        |                         |                                                                                                                    |                        | ✓                | ✓                |
| 11 | BTLNBR                   | Niskin bottle number  |                         |                                                                                                                    |                        | ✓                | ✓                |
| 12 | CASTNO                   | Cast number           |                         |                                                                                                                    |                        | ✓                | ✓                |
| 13 | CTDPRS                   | Pressure              | dbar                    | CTD pressure                                                                                                       |                        | ✓                | ✓                |
| 14 | DEPTH                    | Depth                 | Meters                  | Depth from pressure                                                                                                |                        | ✓                | ✓                |
| 15 | CTDSAL                   | Salinity              |                         | CTD salinity                                                                                                       | PSS-78                 | ✓                | ✓                |
| 16 | CTDSAL_FLAG_W            | Salinity flag         |                         | WOCE flags                                                                                                         |                        | ✓                | ✓                |
| 17 | CTDTMP                   | Temperature           | °C                      | CTD temperature                                                                                                    | ITS-90                 | ✓                | ✓                |
| 18 | THETA                    | Potential temperature |                         | Theta from CTDTMP & CTDSAL                                                                                         |                        | ✓                | ✓                |
| 19 | NITRAT                   | Nitrate               | $\mu\text{mol kg}^{-1}$ | standard colorimetric methods*                                                                                     |                        | ✓                | ✓                |
| 20 | NITRAT_FLAG_W            | Nitrate flag          |                         | WOCE flags<br>After 1 <sup>st</sup> quality control                                                                | Details in Section 4.4 | ✓                | ✓                |
|    |                          |                       |                         | Flags after 2 <sup>nd</sup> QC<br>Flag 2: adjusted and acceptable<br>Flag 3: adjusted and recommended questionable |                        |                  |                  |
| 21 | PHSPHT                   | Phosphate             | $\mu\text{mol kg}^{-1}$ | standard colorimetric methods*                                                                                     |                        | ✓                | ✓                |
| 22 | PHSPHT_FLAG_W            | Phosphate flag        |                         | WOCE flags<br>After 1 <sup>st</sup> quality control                                                                | Details in Section 4.4 | ✓                | ✓                |
|    |                          |                       |                         | Flags after 2 <sup>nd</sup> QC<br>Flag 2: adjusted and acceptable<br>Flag 3: adjusted and recommended questionable |                        |                  |                  |
| 23 | SILCAT                   | Silicate              | $\mu\text{mol kg}^{-1}$ | standard colorimetric methods*                                                                                     |                        | ✓                | ✓                |
| 24 | SILCAT_FLAG_W            | Silicate flag         |                         | WOCE flags<br>After 1 <sup>st</sup> quality control                                                                | Details in Section 4.4 | ✓                | ✓                |
|    |                          |                       |                         | Flags after 2 <sup>nd</sup> QC<br>Flag 2: adjusted and acceptable<br>Flag 3: adjusted and recommended questionable |                        |                  |                  |

\* Standard colorimetric methods of seawater analysis (Grasshoff et al. (1999)).

#### - Data format

*Original dataset: CNR\_DIN\_WMED\_20042017\_original.csv:* This is the original dataset with 24 parameter including flag variables of 24 cruises for nitrate, phosphate, silicate and CTD salinity from the primary quality control.



*Adjusted dataset: CNR\_DIN\_WMED\_20042017\_adjusted.csv*: This is the adjusted product with 24 parameters, after removing outlier data (issued from primary quality control) and after applying adjustment factors from the secondary quality control (Crossover Analysis).
